# Supplementary material for: Cervical End-Range Joint Motion Does Not Indicate Maximum Cervical Joint Motion In Healthy Adults. An Observational Study
Source: Research Square preprint supplement (doi:10.21203/rs.3.rs-90272/v1), 2020-10-21
Supplement: Supplementary file 1 [file 84900cbc551839b774006d5e.xlsx]

## Sheet: Table 6
						Anti-directional flexion				Anti-directional extension
						End-range		Excursion		End-range		Excursion
					Joints	Count	Mean± SD	Count	Mean± SD	Count	Mean± SD	Count	Mean± SD
					C0C1	5	2.93 ± (1.53)	13	2.18 ± (1.93)	1	2.72	12	2.15 ± (1.42)
					C1C2	5	5.97 ± (2.68)	14	3.11± (4.67)	4	3.72 ± (0.98)	8	2.47 ± (1.73)
					C2C3	1	2.16	14	2.08 ± (1.71)	4	1.84 ± (1.48)	15	2.83 ± (1.82)
					C3C4	0	---	13	1.26 ± (0.92)	1	0.3	14	1.78 ± (1.30)
					C4C5	0	---	9	1.20 ± (1.07)	0	---	10	1.65 ± (1.23)
					C5C6	0	---	16	1.27 ± (1.03)	0	---	15	1.23 ± (0.87)
					C6C7	1	0.32	18	2.04 ± 1.75)	4	---	21	1.80 ± (1.38)
