# Supplementary material for: Cervical End-Range Joint Motion Does Not Indicate Maximum Cervical Joint Motion In Healthy Adults. An Observational Study
Source: Research Square preprint supplement (doi:10.21203/rs.3.rs-90272/v1), 2020-10-21
Supplement: Supplementary file 2 [file ba462d5baa9c4a36559d7999.xlsx]

## Sheet: Sheet1
					Quartile	Flexion	C0C1	C1C2	C2C3	C3C4	C4C5	C5C6	C6C7	C0C3	C3C7
					1	Degrees	2.20°	4.36°	4.13°	1.96°	2.50°	1.68°	2.73°	3.56°	2.22°
					1	Percent	200.70%	204.06%	359.44%	92.64%	93.97%	37.43%	75.65%	254.73%	74.92%
					2	Degrees	1.52°	2.92°	3.76°	2.26°	0.57°	2.56°	0.44°	2.73°	1.45°
					2	Percent	78.63%	62.41%	100.75%	50.42%	11.93%	38.11%	7.87%	80.60%	27.08%
					3	Degrees	1.91°	4.35°	1.18°	1.44°	1.49°	1.25°	0.38°	2.48°	1.14°
					3	Percent	69.01%	61.71%	21.16%	25.61%	20.38%	11.61%	4.04%	50.62%	15.41%
					4	Degrees	3.86°	3.33°	2.41°	1.63°	1.14°	0.12°	1.12°	3.20°	1.0°
					4	Percent	76.01%	31.31%	26.26%	17.10%	9.59%	0.77%	8.85%	44.52%	9.08%
					Number of joints		18	22	22	20	18	8	5	62	51
					Quartile	Extension	C0C1	C1C2	C2C3	C3C4	C4C5	C5C6	C6C7	C0C3	C3C7
					1	Degrees	2.38°	4.53°	3.37°	1.51°	1.25°	0.99°	1.49°	3.43°	1.31°
					1	Percent	184.00%	171.05%	232.31%	89.68%	33.89%	29.69%	137.52%	195.85%	72.69%
					2	Degrees	1.92°	3.26°	1.73°	2.02°	1.73°	3.20°	1.20°	2.30°	2.04°
					2	Percent	35.05%	75.04%	48.18%	40.39%	25.11%	53.14%	36.12%	52.75%	38.69%
					3	Degrees	0.96°	2.64°	2.88°	1.61°	0.77°	2.39°	1.22°	2.16°	1.45°
					3	Percent	8.55%	40.16%	46.93%	22.44%	7.31%	28.85%	27.24%	31.88%	21.46%
					4	Degrees	2.68°	3.11°	1.28°	0.66°	0.33°	0.52°	1.42°	2.36°	0.74°
					4	Percent	12.39%	25.81%	13.19%	6.35%	2.24%	3.27%	24.42	17.13%	9.07%
					Number of joints		8	20	16	16	16	16	17	44	65
